# Supplementary material
Source: publisher figshare collection journal article supplement (https://gsajournals.figshare.com/ndownloader/files/13448519)
Supplement: Supplementary file 1 [file 13448519]

## Sheet: Volume 1 Issue 1 (1970)
title	authors	number of authors	number of male authors	number of female authors	ambiguous authors	affiliation	acknowledgements	programmers acknowledged?	number of programmers	number of male programmers	number of female programmers	student researcher
Species Packing and Competitive Equilibrium for Many Species	Robert MacArthur	1	1	0	NA	Princeton University	Richard Lewontin showed me how Section II could be developed and Motoo Kimura pointed out the validity of Eq. 3. To both I am immensely grateful. Henry Horn and Egbert Leigh made numerous useful suggestions. p. 11	No	0	0	0	Rochelle Reyes
Probabilistic Fertility Models of the Life Table Type	Jan M. Hoem	1	1	0	Jan M. Hoem: https://www.google.com/url?sa=t&rct=j&q=&esrc=s&source=web&cd=2&ved=0ahUKEwiAzezwgvzWAhUJsVQKHQ0BDmQQFgguMAE&url=https%3A%2F%2Fwww.demographic-research.org%2Fvolumes%2Fvol36%2F24%2F36-24.pdf&usg=AOvVaw1fWg9__cEEJ9JLzv7IoZ4h	Central bureau of Statistics, Norway; University of California, Berkeley	NA	No	0	0	0	Rochelle Reyes
Linkage and Selection: Two Locus Symmetric Viability Model	Samuel Karlin, Marcus W. Feldman	2	2	0	NA	Stanford University	The authors thank Professors R. C. Lewontin and W. Bodmer for a number of helpful suggestions on the manuscript. p. 70	No	0	0	0	Rochelle Reyes
The Effect of Linkage in a Finite Random-Mating Population	G. A. Watterson	1	1	0	G. A. Watterson: https://iase-web.org/documents/papers/isi55/Gani.pdf Seneta, FAA, Professor in the School of Mathematics and Statistics of the University of Sydney, G.A. Watterson, FAA, Reader in Mathematics at Monash University until his retirement when he withdrew from the Academy of Science, C.K. Cheong, formerly CEO of Singapore Airlines and currently Executive Chairman of the Singapore-base…	Monash University, Victoria, Australia	I thank Mrs. H. Walker for computing Tables II, III, and IV and, also, Professor S. Karlin for many helpful comments on an earlier draft. The hospitality of the universities of Sheffield and Aarhus has been much appreciated during the stage of revising an earlier draft. p. 86	Mrs. H. Walker	1	0	1	Rochelle Reyes
On the Evolutionary Effect of Recombination	Ilan Eshel, Marcus W. Feldman	2	2	0	Ilan Eshel: https://www.google.com/url?sa=t&rct=j&q=&esrc=s&source=web&cd=1&ved=0ahUKEwiBsJSVg_zWAhUHrVQKHbtWCz4QFggoMAA&url=http%3A%2F%2Fwww.math.tau.ac.il%2F~illan%2F&usg=AOvVaw2SGZYSyHY66bkgV_B5ebrB	Tel Aviv University, Stanford University	The authors are grateful to Professor Samuel Karlin for a number of stimulating discussions and for allowing us to see his unpublished results with Professor James McGregor. p. 100	No	0	0	0	Rochelle Reyes
On the Rate of Decrease of Heterozygosity in Circular Stepping Stone Models of Population	Takeo Maruyama	1	1	0	NA	National Institute of Genetics, Japan	It is my pleasure to thank Dr. Motoo Kimura who suggested the subject of this paper and to whom I owe a number of substantial improvements. Also, I would like to thank Dr. Alan Robertson who suggested the investigation presented in Section 5, and Dr. Joseph Felsenstein for reading the report in manuscript form. p. 118	No	0	0	0	Rochelle Reyes
Some Optimum Problems in Individual Selection	Alan Robertson	1	1	0	NA	Institute of Animal Genetics, Scotland	NA	No	0	0	0	Rochelle Reyes

## Sheet: Vol 12 (1970)
n	authors	number of authors	number of male authors	number of female authors	ambiguous authors	affiliation	acknowledgements	programmers acknowledged?	number of programmers	number of male programmers	number of female programmers	student researcher
Remarks on the Substitutional Load	W. J. Ewens	1	1	0	Warren J. Ewens: https://statistics.wharton.upenn.edu/faculty/faculty-list/ https://en.wikipedia.org/wiki/Warren_Ewens	La Trobe University, Australia	NA	No	0	0	0	Rochelle Reyes
A Mathematical Model for Interaction of Gene Frequency in a Parasite and Its Host	S. D. Jayakar	1	1	0	Suresh D. Jayaker: http://onlinelibrary.wiley.com/store/10.1046/j.1420-9101.1988.1040289.x/asset/j.1420-9101.1988.1040289.x.pdf?v=1&t=jdoz70ao&s=0b5ec78c5b20015d8cf923c413bd7c8c3c3810e6&systemMessage=Wiley+Online+Library+is+migrating+to+a+new+platform+powered+by+Atypon%2C+the+leading+provider+of+scholarly+publishing+platforms.+The+new+Wiley+Online+Library+will+be+migrated+over+the+weekend+of+Febr…	International Laboratory of Genetics and Biophysics, Istituto di Genetica, Italy	This model came out of discussions I had with Professor M. Polsinelli. Dr. Marc Feldman read the paper critically and the demonstration of convergence in Section 1.1 is due to him. I am also grateful to Dr. C. Cannings for various helpful suggestions. p. 164	No	0	0	0	Rochelle Reyes
The Origin of Male Haploid Genetic Systems and Their Expected Sex Ratio	Daniel L. Hartl, Spencer W. Brown	2	2	0	NA	University of California, Berkeley	We are grateful to Professor E. Dempster for his many detailed suggestions on the manuscript and to Professor J. F. Crow for having brought the scolytids to our attention. p. 188	No	0	0	0	Rochelle Reyes
Ergodic Properties of Populations I: The One Sex Model	Beresford Parlett	1	1	0	NA	University of California, Berkeley	The author gratefully acknowledges the encouragement and help he has received from Nathan Keyfitz of the Demography Department, Berkeley. p. 207	No	0	0	0	Rochelle Reyes
On Simple Approximate Calculations Appropriate to Populations with Random Growth Rates	J. H. Pollard	1	1	0	John Pollard: https://researchers.mq.edu.au/en/organisations/department-of-applied-finance-and-actuarial-studies http://www.businessandeconomics.mq.edu.au/contact_the_faculty/all_fbe_staff/pollard_john	Macquarie University, Australia	NA	No	0	0	0	Rochelle Reyes
Change of Fitness by Selection for a Quantitative Character	Peter O'Donald	1	1	0	NA	Nuffield Unity of Medical Genetics, University of Liverpool	NA	No	0	0	0	Rochelle Reyes
On the Equivalence of Random Mating and Random Union of Gametes Models in Finite, Monoecious Populations	G. A. Watterson	1	1	0	G. A. Watterson: https://iase-web.org/documents/papers/isi55/Gani.pdf Seneta, FAA, Professor in the School of Mathematics and Statistics of the University of Sydney, G.A. Watterson, FAA, Reader in Mathematics at Monash University until his retirement when he withdrew from the Academy of Science, C.K. Cheong, formerly CEO of Singapore Airlines and currently Executive Chairman of the Singapore-base…	Monash University, Australia	NA	No	0	0	0	Rochelle Reyes

## Sheet: Vol 13 (1970)
title	authors	number of authors	number of male authors	number of female authors	ambiguous authors	affiliation	acknowledgements	programmers acknowledged?	number of programmers	number of male programmers	number of female programmers	student researcher
Births Averted by Contraception: An Approach Through Renewal Theory	R. G. Potter	1	1	0	Robert G. Potter: https://www.jstor.org/stable/3349285?seq=6#page_scan_tab_contents	Brown University, Uniersity of Michigan	The writer gratefully acknowledges support received from the Ford Foundation and The Population Council, the programming assistance of Barbara McCann, and the helpful comments of Anrudh K. Jain. p. 271	Barbara McCann	1	0	1	Rochelle Reyes
Effective Number of Alleles in a Subdivided Population	Takeo Maruyama	1	1	0	NA	National Institute of Genetics, Japan	I wish to acknowledge the encouragement and help offered, at all times, by Dr. Motoo Kimura. Thanks are also due to Dr. Joseph Felsenstein for correcting the English making valuable sugestions. p. 306	No	0	0	0	Rochelle Reyes
A General Investigation into the Mortality and Multiplication of the Human Species	Leonhard Euler; Translated by: Nathan and Beatrice Keyfitz	3	2	1	NA	University of California, Berkeley	Frank Lorimer, The development of demography, in (P. M. Hauser and O. D. Duncan, Eds.), "The Study of Population," Univ. Chicago Press, Chicago, Ill., 1959, lists Euler's article as follows: 1760. Euler, Leonhard. "Recherches generales sur la mortalite et la multiplication du genre humain," Histoire de l'Academie Royale des Sciences et Belles-Lettres, annee 1760, pp. 144-64. Berlin, 1767. The oth…	No	0	0	0	Rochelle Reyes
Malthusian Parameters in Genetic Populations. I. Haploid and Selfing Models	Edward Pollak, Oscar Kempthrone	2	2	0	Na	Iowa State University	The authors are grateful to Professor Leo A. Goodman for pointing out an error in the original manuscript and to referees for making suggestions that enabled us to improve the presentation. We wish to acknowledge also critical comments of L. Jensen. p. 344	No	0	0	0	Rochelle Reyes
The Birth Trajectory Corresponding to Particular Population Sequences	Samuel H. Preston	1	1	0	NA	University of California, Berkeley	Jan Hoem gave generously of his time in order to make many helpful comments at each stage of the paper's development. Nathan Keyfitz also offered a number of valuable suggestions. p. 351	No	0	0	0	Rochelle Reyes
Selection in Populations with Overlapping Generations. I. The Use of Malthusian Parameters in Population Genetics	Brian Charlesworth	1	1	0	NA	University of Chicago	I wish to thank Drs. J. T. Giesel and R. C. Lewontin for many useful discussions, and Drs. Lewontin and E. Pollak for their criticisms of the manuscript. p. 369	No	0	0	0	Rochelle Reyes
On Quasilinkage Equilibrium and the Fundamental Theorem of Natural Selection	Marcus W. Feldman, James F. Crow	2	2	0	NA	Stanford University, University of Wisconsin	The authors are indebted to Professor S. Karlin for important suggestions and encouragement in the preparation of this manuscript. p. 390	No	0	0	0	Rochelle Reyes

## Sheet: Vol 21 (1971)
Title	authors	Number of Authors	Number of male authors	number of female authors	ambiguous authors	affiliation	acknowledgements	programmers acknowledged?	Number of Programers	Number of Male Programmers	number of female programmers	Student Researcher
Vito Volterra and Theoretical Ecology	Francesco M. Scudo	1	1	0	NA	Departments of Genetics and Mathematics, Stanford University, Stanford, California	Space prevents me from acknowledging individually the many contributors to this work. I shall simply list them in aphabetical order: Mrs. Luisa d'Ancona, Mr. W.W.Carver, Mr. E. Eshel, Professor G. Goodman, Professor s. hubbell, Professor J.B. Keller, Professor S. Karlin, Professor N. Keyfitz, Miss Gail Lemmond, Professor J. McGregor, Professor G. Mozzi, and Professor I.W. Richardson. To all of th…	No	0	0	0	Ezequiel Lopez
The Survival of Recessive Lethals in Finite Population	Alan Robertson, Prem Narain	2	2	0	NA	Institute of Animal Genetics, University of Edinburgh, West Mains Rd., Edinburgh	NA	No	0	0	0	Ezequiel Lopez
Estimators for Viability in Experimental Populations, their Variances and Covariances	P. Stam	1	1	0	Piet Stam: https://genetics.mgh.harvard.edu/goodman/doc/joinmap_manual.html https://books.google.com/books?id=MfskAAAAQBAJ&pg=PP12&lpg=PP12&dq=piet+stam,+agricultural+university&source=bl&ots=fDo8rLdUTw&sig=WIYJtt_qyiHKJ-fsaiMkOClDGPQ&hl=en&sa=X&ved=0ahUKEwjtgZ6u16LaAhUGWa0KHaHXAfgQ6AEILDAB#v=onepage&q=piet%20stam%2C%20agricultural%20university&f=false	Department of Genetcs, Agricultural University, Wageningen,The Netherlands	NA	No	0	0	0	Ezequiel Lopez
On Mutation Selection Balance for Two-Locus Haploid and Diploid Populations	Samel Karlin , James McGregor	2	2	0	NA	Department of Mathematics, Stanford University, Stanford, California	We express our indebteness to Drs. I. Eshe l and M.Feldman for calling our attention to the problem and for some stimulating discussions.	No	0	0	0	Ezequiel Lopez
Theoretical Studies on the Use of Translocations for the Control of Tsetse Flies and Other Disease Vectors	C. F. Curtis, W.G. Hill	2	2		C.F. Curtis: https://books.google.com/books?id=POnvCAAAQBAJ&pg=PP6&lpg=PP6&dq=Dr.+C.+F.+Curtis,+biology,+London&source=bl&ots=Zaw4Xora5f&sig=yVVVPTxVqAJ_5s08W60apkeJxbM&hl=en&sa=X&ved=0ahUKEwiuiIbQuIXZAhUE42MKHb-pDxwQ6AEIOTAF#v=onepage&q=Dr.%20C.%20F.%20Curtis%2C%20biology%2C%20London&f=false William G. Hill: https://www.ncbi.nlm.nih.gov/pmc/articles/PMC1569510/	Tsetse Research LaboratoryUniversity of Bristol, Langford,Bristols, England and Institute of Animal Genetics,Edinburgh, EH 3JN, Scottland	One of us (C.F.C) is grateful to the Ministry of Overseas Developement for financial support and to Mr. J. Robinson and Miss E.P. Bennett for assistance with computer programming	Yes	2	1	1	Ezequiel Lopez
Effect of Exclusion of Sib-Mating on Genetic Drift	Albert Jacquard	1	1	0	NA	Institut National d'Etudes Demographiques,Paris	NA	No	0	0	0	Ezequiel Lopez
Equilibre et Croissance de Populations Soumises a' des Migrations	Herve Le Bras	1	1	0	NA	I.N.E.D, 27, Rue du Commandeur, Paris 14	NA	No	0	0	0	Ezequiel Lopez
Comment on a Proposition of H.Le Bras	Griffith M. Feeney	1	1	0	NA	department of Demography,University of California, Berkeley, California, 94720	This work was suported by NSF grant GZ995,by the NIH research contract 69-2200 Nathan Keyfitz, Principal Investigator) and by training grants to the Department of Demography, University of California, Berkeley, from the National Center for Health Services Research and Developement (8 T01 HS00059 and from The Ford Foundation	No	0	0	0	Ezequiel Lopez

## Sheet: Vol 22 (1971)
title	authors	Number of Authors	Number of male Authors	number of female authors	ambiguous authors	affiliation	acknowledgements	programmers acknowledged?	Number of Programers	Number male of Programers	number of female programmers	student researcher
Linkage Disequilibrium and Homozygosity of Chromosome Segments in Finite Populations.	J. A. Sved	1	1	0	John A. Sved http://journals.plos.org/plosone/article/authors?id=10.1371/journal.pone.0069078	School of BIological Sciences, University of Sydney, N.S.W. Australia	I am indebted to Dr. Ian Franklinfor his help in discussions on this topic. Computing costs were supported by a grant from the Australian Research Grants Council.	No	0	0	0	Ezequiel Lopez
Finch Flocks in the Mojave Desert	Martin L. Cody	1	1	0	NA	Department of Zoology, University of California, Los Angeles, California	Part of the field work described inthis paper was undertaken bystudents registered in Field Ecology, offered at the Universityof California Los Angeles. William Rand, Massachusetts Institute of Technology, developed the computer program and assisted in the theoretical arguments. Drs. James Brown and Donald Landenberger made useful changes to the manuscript. Financial assistance was provided by Na…	No	0	0	0	Ezequiel Lopez
The Distribution and Comparison of "Genetic Loads" Under Heterotic Selection and Simple Frequency- Dependent Selection in Finite Populations.	Ken-ichi Kojima	1	1	0	Ken-ichi Kojima: https://d.lib.ncsu.edu/collections/catalog/0004727#?c=0&m=0&s=0&cv=0&z=-6695.7724%2C0%2C22466.5448%2C11400	Department of Zoology, University of Texas at Austin,Texas 78712	The author wishes to thank John H. Gillespie for his very stimulating discussions while preparing this paper.	No	0	0	0	Ezequiel Lopez
Theoretical Foundation of Population Genetics at the Molecular Level	Motoo Kimura	1	1	0	Motoo Kimura: https://authors.library.caltech.edu/5456/1/hrst.mit.edu/hrs/evolution/public/profiles/kimura.html	National Institute of Genetics, Mishima Japan	I would like to thank Dr. James F. Crow for reading the manuscript and giving many valuable suggestions. The main results presented in this paper are the outcome of my collaboration with him,Drs. Tomoko Ohta and Takeo Maruyama. To all of them I would liketo express my deep appreciation. Thanks are also due to Dr.S.Karlinfor his stimulus and ecouragement to write this paper.	No	0	0	0	Ezequiel Lopez
On Evolution in a Population with an Infinite Number of Types	Ilan Eshel	1	1		Ilan Eshel: https://www.google.com/url?sa=t&rct=j&q=&esrc=s&source=web&cd=1&ved=0ahUKEwiBsJSVg_zWAhUHrVQKHbtWCz4QFggoMAA&url=http%3A%2F%2Fwww.math.tau.ac.il%2F~illan%2F&usg=AOvVaw2SGZYSyHY66bkgV_B5ebrB	Department of Matematics, Stanford University, Stanford Calif. 94305 Department of Statistics, tel Aviv University, Tel Aviv, Israel	I am especially indebted to Professor Samuel Karlin, for his generous help and counsel throughout this research. I am grateful also to Dr. Marcus Feldman and Professor James McGregor for reading the manuscript and offering helpful criticism, and to Mr. William W. Carver for editorial assistance, and Mrs. Saundra Cecil for drawing the figures.	No	0	0	0	Ezequiel Lopez
A Model Incorporating Energy Utilization for the Dynamics of Single Species Population	Mitchell E. Timin, Boyd D. Collier	2	2	0	NA	Department of Biology, San Diego State College, San Diego, California 92115	NA	No	0	0	0	Ezequiel Lopez

## Sheet: Vol 23 (1971)
title	authors	number of authors	number of male authors	number of female authors	ambiguous authors	affiliation	acknowledgements	programmers acknowledged?	number of programmers	number of male programmers	number of female programmers	student researcher
The Estimation of Parameters from Populations Data on the General Stochastic Epidemic	Norman T. J Bailey, Anthony S. Thomas	2	2	0	NA	World Health Organization, Geneva, Switzerland	NA	No	0	0	0	Ezequiel Lopez
On the Shannon-Weaver Index of Diversity, in Relation to the Distribution of Species in Bird Censuses	M.S. Longuet-Higgins	1	1	0	Michael.S. Longuet-Higgins: https://en.wikipedia.org/wiki/Michael_S._Longuet-Higgins	Department of Applied Mathematics and Theoret-ical Physics, Cambridge University, Silver Street Cambridge, England.National Institute of Oceonagraph, Wormley, Godalming, England.	I am indebted to Dr. M. V. Angel and Mrs. A. C. Edden for Discussion on this topic	No	0	0	0	Ezequiel Lopez
On the Shannon-Weaver Index of Diversity, in Relation to the Distribution of Species in Bird Censuses	Lawrence L. Kupper, David G. Kleinbaum	2	2	0	Lawrence L. Kupper: http://www.advancehealthsolutions.com/kupper/	Department of Biostatistics, School of Public Health, University of North Carolina, Chapel Hill, North Carolina 27514	The authors thank Professor Nathan Keyfitz and the referees for a number of helpful suggestions concerning the manuscript	No	0	0	0	Ezequiel Lopez
Equilibrium Studies of Two Locus Haploid Populations with Recombination	Marcus W. feldman	1	1	0	NA	Department of Biological Sciences, Stanford University, Stanford,California	The author is greatly indebted to Professor S. Karlin for his encouragement and assistance. I also thank Dr. Giora Simchen for a number of stimulating discussions, and the Weizmann Institute of science, Israel, for its hospitality during part of this work.	No	0	0	0	Ezequiel Lopez
On the interpretation of the Maternity Function as a Probability density	Jan M. Hoem	1	1	0	Jan M. Hoem: https://www.google.com/url?sa=t&rct=j&q=&esrc=s&source=web&cd=2&ved=0ahUKEwiAzezwgvzWAhUJsVQKHQ0BDmQQFgguMAE&url=https%3A%2F%2Fwww.demographic-research.org%2Fvolumes%2Fvol36%2F24%2F36-24.pdf&usg=AOvVaw1fWg9__cEEJ9JLzv7IoZ4h	Central Bureau of Statistics Norway	I am grateful to Nathan Keyfitz for many helpful discussions both on the subject matter and on the presentation of this paper, and for suggesting the idea which ledto the account in section 3. I also thank Bjorn Tonnesen, who has checked all arguments in the paper.	No	0	0	0	Ezequiel Lopez
Pedigree Probability Calculus by Means of Linear Operators	Jostein Lillestol	1	1	0	Jostein Lillestol: https://www.nhh.no/en/employees/faculty/jostein-kare-lillestol/	The Norweigian school ofEconomics and Business Administration, Bergen, Norway	NA	No	0	0	0	Ezequiel Lopez
On the Sensitivity of the Intrinsic Growth Rate to Changes in the Age-Specific Birth and Death Rates	Leo A. Goodman	1	1	0	NA	University of Chicago	For the helpful comments, the author is indebted to B.Charlesworth, L.Demetrius, G. Dunkel, and R. Lewontin	No	0	0	0	Ezequiel Lopez

## Sheet: Vol 24 (1971)
Title	authors	number of authors	number of male authors	number of female authors	ambiguous authors	Affiliation	Acknowledgements	programmers acknowledged?	ambiguous programmer	number of programmers	number of male programmers	number of female programmers	student researcher
Malthusian Parameters in Genetic Populations Part II. Random Mating Populations in Infinited Habitats	Edward Pollak and Oscar Kempthorne	2	2	0	NA	Department of Statistics Iowa State University, Ames, Iowa 50010	The authors thank Professor B.D.H. Latter and Dr. E.N. West for help incomputing tables I, II, IV, and V, and Mr. L. Jensen for carefully reading the manuscript.	Yes	B.D.H Latter: https://books.google.com/books?id=Eh_H20JiX4IC&pg=PA408&dq=Latter,+B.D.H&hl=en&sa=X&ved=0ahUKEwiXnoKP-6PZAhUM2mMKHRx6CzQQ6AEILzAB#v=onepage&q=Latter%2C%20B.D.H&f=false Dr. E.N. West: https://www.tandfonline.com/doi/abs/10.1080/00949657208810001?journalCode=gscs20	1	1	0	Ezequiel Lopez
The Rate of Loss of Multiple Alleles in Finited Haploid Populations	Joseph Felsenstein	1	1	0	NA	Deparment of Zoology, University of Chicago, Chicago, Illinois	I wish to thank samuel Karlin, James McGregor, William G. Hill, and Alan Robertson for helpful criticism and discussion. I also wish to thank R.C. Elston, and P.M. Burrows for their constructive criticisms of an earlier version of this paper. This work was done in part while the author was a recipient of a fellowship from NIH GeneticsTraining Grant No. 5T01 GM-00090 and has also been supported by…	No	NA	0	0	0	Ezequiel Lopez
A Necessary Condition for Equilibrium in Systems Exhibiting Self-Incompatible Mating	Philip T. Spieth	1	1	0	NA	Department of Biology University of Oregon, Eugene, Oregon 97403	i wish to express my thanks to Dr. E. Novitski for introducting me to the problem of self-incompatibility and for his support and advice throughout the course of this research	No	NA	0	0	0	Ezequiel Lopez
Extinction Time of Deleterious Mutant Genes in Large Populations	Masatoshi Nei	1	1	0	Masatoshi Nei: https://en.wikipedia.org/wiki/Masatoshi_Nei	Division of Biological and Medical Sciences, Brown University, Rhode Island	NA	No	NA	0	0	0	Ezequiel Lopez
Total Number of Individuals Affected by a Single Deleterious Mutation in Large Populations	Masatoshi Nei	1	1	0	Masatoshi Nei: https://en.wikipedia.org/wiki/Masatoshi_Nei	Division of Biological and Medical Sciences, Brown University, Rhode Island 02192	I am grateful to Dr. Motoo Kimura for his valuable comments on an earlier draft.	No	NA	0	0	0	Ezequiel Lopez
Some Further Remarks "on Testing Hypotheses Concerning Standardized Molarity Ratios	Lawrence L. Kupper	1	1	0	Lawrence L. Kupper: http://www.advancehealthsolutions.com/kupper/	Department of Biosta-tistics, University of North Carolina, Chapel Hill, North Carolina 27514	NA	No	NA	0	0	0	Ezequiel Lopez
The Number of Neutral Alleles Maintained in a finite, Geo-graphically structured Population	James F. Crow, Takeo Maruyama	2	2	0	NA	Genetics Laboratory, University of Wisconsin, Madison, Wisconsin and National Institute of Genetics, Mishima, Japan	We should like to thank Motoo Kimura, Sewall Wright, Newton Morton, John Maynard Smith, and Tomoko Ohta for useful suggestions and comments on the manuscript.	No	NA	0	0	0	Ezequiel Lopez
On the Interpretation of Certain Vital Rates as Averages of Underlying Forces of Transition	Jan M. Hoem	1	1	0	Jan M. Hoem: https://www.google.com/url?sa=t&rct=j&q=&esrc=s&source=web&cd=2&ved=0ahUKEwiAzezwgvzWAhUJsVQKHQ0BDmQQFgguMAE&url=https%3A%2F%2Fwww.demographic-research.org%2Fvolumes%2Fvol36%2F24%2F36-24.pdf&usg=AOvVaw1fWg9__cEEJ9JLzv7IoZ4h	Central bureau of Stat-istics, Oslo, Norway	I wish to acknowledge my great indebtedness to Nathan Keyfitz for many conversations on the subject matter of the present paper. I am also grateful to Nader Fergany, Samuel Preston, Robert Retherford, and Griffith Feeney, discussions with whom inspired many of the formulations here; and to Mr. Bjorn Tonnesen, who has checked all arguments and formulas	No	NA	0	0	0	Ezequiel Lopez
The Evolutionary Advantages of Sexual Dimorphism	P.E. Smouse	1	1	0	Peter .E. Smouse: http://deenr.rutgers.edu/smouse.html	Department of Zoology, University of Texas, Austin Texas	The author wishes to thank Dr. W.J. Edwens, Dr. J.W. Crow, and Dr.K. Kojima for a number of very helpfull discussions on this paper.	No	NA	0	0	0	Ezequiel Lopez
The Evolution of Dominance: A Direct Approach Through the Theory of Linkage and Selection	Marcus W. Feldman, Samuel Karlin	2	2	0	NA	department of Biological Sciences, Stanford University, Stanford, CA and Department of Matematics, Stanford University, Stanford, CA and the Weismann Institute of Science, Rehovot, Israel	NA	No	NA	0	0		Ezequiel Lopez
Evolution of Dimorphism in a Predator-Prey Model	Frank M. Stewart	1	1	0	NA	Department of Matematics Brown University, Providence, Rhode Island 02912	The Author is very Grateful to Professor Bruce Levin and Professor Masatoshi Nei for many stimulating conversations in which they tried to clarify his often naive ideas about biology. He is also most appreciative of Professor James Sakoda's generosity in making available some computer time supported by NIMH Gant Number MH 08177	No	NA	NA	NA		Ezequiel Lopez
Nioassay of Kinship	N.E. Morton, Shirley Yee, D.E. Harris, Ruth Lew	4	2	2	Newton .E. Morton: https://en.wikipedia.org/wiki/Newton_Morton	Population Genetics Laboratory University of Hawaii, Honolulu, Hawaii	NA	No	NA	0	0		Ezequiel Lopez

## Sheet: Vol 31 (1972)
Title	authors	number of authors	numbe of male authors	number of female authors	ambiguous authors	Affiliation	acknowledgements	programmers acknowledged?	number of programmers	number of male programmers	number of female programmers	Student researcher
Distribution of Birth Intervals According to the Sampling Frame	Mindel C. Sheps and Jane A Menken	2	0	2	NA	Department of Biostatistics, School of Public Health, University of North Carolina and Office of Population Research, Princeton University	The paper acknowledged The Center of Population Research, National Institute of Child Health and HUman Devleopment. In addition the Program was supported out through Princeton University with the aid of the Office of Population Research by the Ford Foundation, the Rockefeller Foundation, and the Milbank Memorial Fund	No	0	0	0	Edgar Castellanos
Probabiliyu of Fixation of Genes in Population of Variable Sizes	Williams G. Hill	1	1	0	NA	Statistical Laboratory , Iowa State University	NA	No	0	0	0	Edgar Castellanos
Models of Poupulation Genetics of Batesian Mimicry	C. Matessi and R Cori	2	2	0	Carlo Matessi https://pdfs.semanticscholar.org/13c7/d8676c59fcc17977a64c237634b846af3f35.pdf Robert Cori http://www.sciencedirect.com/science/article/pii/S0304397501002213	Laboratorio di Genetica Biochimica ed Evoluzionistica del C.N.R c/o Instituto di Genetica dell' Universita di Pavia , Pavia, Italy	This work was supported by grants from the U.S. A.E.C	S.D Jayakar	1	1	0	Edgar Castellanos
Births Averted by Induced Abortion: An Application of Renewal Theory	R.G. Potter	1	1	0	Robert G. Potter: https://www.jstor.org/stable/3349285?seq=6#page_scan_tab_contents	Department of Sociology, brown University Providence, Rhode Isalnd 02912 and Population Studies Center, UNiversity of Michigan , Ann Arbor, Michigan 48104	The writer gratefully acknowledges support received from the Ford Foundation and The Population Council. And the programming assistance of Barbara McCann and Joan Kieper with the helpful comments of Nathan Keyfits, Mindel Sheps, and three anonymous reviewers	yes- Barbara McCann and Joan Kieper	2	0	2	Edgar Castellanos
The Sampling Theory of Selectivity Neutral Alleles	W.J.Ewens	1	1	0	Warren J. Ewens: https://statistics.wharton.upenn.edu/faculty/faculty-list/ https://en.wikipedia.org/wiki/Warren_Ewens	Department of Zoology, University of Texas at Austin, Texas 78712	Principal debt is to James F. Crow-who made many valuable suggestions and help during the research. The work was carried out under the hospitality of K.Kojima. Invaluble aid from Charles Langley and Professor F.N. David. Solutions to the problems of construction of an index function and of forming objecitive statistical test of the neutrality hypothesis was suggested by R.K Selander. Final draft …	no	0	0	0	Edgar Castellanos
Addenum to a Paper of W.Ewens	S. Karlin and J. McGregor	2	2	0	S. Karlin: https://books.google.com/books?hl=en&lr=&id=dr_iBQAAQBAJ&oi=fnd&pg=PP1&dq=S.+Karlin+&ots=bkT5y0nH8p&sig=Rqtnxh3EiaUfmkkTnkwYPJrHsuU#v=onepage&q=S.%20Karlin&f=false James. McGregor: https://msp.org/pjm/1959/9-4/pjm-v9-n4-p13-p.pdf	Department of Mathematics Weizmann Institute of Science, Rehovot, Israel and Stanford University, California. Department of Mathematics , Stanford Univeristy	Research supported by NIH Grants USPRS 10452-09	no	0	0	0	Edgar Castellanos

## Sheet: Vol 32 (1972)
Title	authors	#of authors	number of male authors	number of female authors	ambiguous authors	Affiliations	Acknowledgements	programmers acknowledged	# of programmers	# of male programmers	number of female programmers	student researcher
Markov Population Processes as Models of Primate Social and Population Dymanics	Joel E. Cohen	1	1	0	NA	Department of Biology, Harvard University, Cambridge, Massachusetts 02138	I thank Samuel Karin for making me aware of Kingman's (1969) work and J.F.C Kingman and referees for repeated and very substantial assiatance. The research was supported by the National Science Foundation, the Population Council of New York, and Harvard and Princeton Universities	n0	0	0	0	Edgar Castellanos
Nuptiality	Louis Henry	1	1	0	NA	Institut National d'Etudes Demographiques, Paris, France	none	no	0	0	0	Edgar Castellanos
Concept of Substitutional Load in Finite Populations	W.J.Ewens	1	1	0	W.J.Ewens: https://books.google.com/books?hl=en&lr=&id=ZobfBwAAQBAJ&oi=fnd&pg=PR16&dq=W.J.Ewens&ots=6441JvizbK&sig=L0DQidNxRkMnhIxkpKJHqE0WP9M#v=onepage&q&f=false	Department of Zoology, University of Texas at Austin, Texas 78712	Supported by USPHA Grant GM-15769.	none	0	0	0	Edgar Castellanos
Interrelations Between Death Rates and Birth Rates	Samuel H. Preston	1	1	0	NA	Department of Demography, University of California, Berkeley	Comments of Ansley J. Coale, Nathan Keyfitz, and Robert Lundy were helpful in clarifying certain of the issues considered. The research has been supported by trainning grants to the Department of Demography from the National Center for Health Services Research and Development ( 8 T01 HS00059), the National Institute for General Medical Sciences ( 8 T01 GM01240), and from the Ford Foundation.	none	0	0	0	Edgar Castellanos
Applications of Methods of Small Parameters to Multi-Niche Population Genetic Models	Samuel Karlin and James McGregor	2	2	0	NA	Stanford University	Work was supported by National Institute of Health Grant USPRS 10452-09. Weizmann Institute of Science, Israel and Stanford University	none	0	0	0	Edgar Castellanos
Polymorphisms for Genetic and Ecological Systems with Weak Coupling	Samuel Karlin and James McGregor	2	2	0	NA	Stanford University	Work was supported by National Institute of Health Grant USPRS 10452-09. Authors also state that it was a pleasure to have valuable criticism of the manuscript by Professor W. Bodmer, W.Ewens, M. Feldman, W. Hill, E. Nevo, and G. Simchen	none	0	0	0	Edgar Castellanos

## Sheet: Vol 33 (1972)
Title	authors	number of authors	number of male authors	number of female authors	ambiguous authors	Affiliations	Acknowledgements	programmers acknowledged	# of programmers	# of male programmers	number of female programmers	student researcher
The Effects of Stochastic Environments of Allele Frequencies in Natural Populations	John H. Gillespie	1	1	0	NA	Department of Biology, University of Pennsylvania, Philadelphia 19104	student-Dr. Kenichi Kojima-outstanding contribution to population genetics and role in paper development. Also would like to thank Dr. Richard Lewontin for comments on earlier draft. Final draft was improved by Dr. James Crow, Dr. Warren Ewens,and Dr. Charles Langley	no	0	0	0	Edgar Castellanos
Linearization of Crossing-Over and Mutation in a Finite Random-Mating Population	Daniel Serant and Michel Villard	2	2	0	NA	U.E.R. De Mathematiques, Universite de Lyon I, France	none	none	0	0	0	Edgar Castellanos
On the Neighbor Effects and the Evolution of Altruistic Traits	Ilan Eshel	1	1	0	Ilan Eshel: https://www.google.com/url?sa=t&rct=j&q=&esrc=s&source=web&cd=1&ved=0ahUKEwiBsJSVg_zWAhUHrVQKHbtWCz4QFggoMAA&url=http%3A%2F%2Fwww.math.tau.ac.il%2F~illan%2F&usg=AOvVaw2SGZYSyHY66bkgV_B5ebrB	Department of Statistics, Tel-Aviv University , Ramat-Aviv, Tel-Aviv, Israel	Research was supported by NAtional Institute of Health Grants USPHS 10452-08. Grateful to Professor Samuel Karin for generous help and advice. Thankful for Professor Francesco Scudo, Professor Walter Bodmer, Luca Cavalli Sforza, James Crow, James McGregor. Warren Ewens, and Marcus Feldman for aid /remarks on manuscript.	no	0	0	0	Edgar Castellanos
Effective Size of Populatios with Overlapping Generations	William G. Hill	1	1	0	NA	Institute of Animal Genetics, University of Edinburgh EH9 3 JN	Dr. J. F. Crow and Dr. J. Felsenstein for copies of their manuscript	none	0	0	0	Edgar Castellanos
Can There be More Predators Than Prey	J Haigh and J. Maynard	2	2	0	John Haight: http://www.sussex.ac.uk/profiles/1117 John Maynard Smith http://www.sussex.ac.uk/lifesci/about/jms	Mathematics Division, University of Sussex, England. School of Biological Sciences , University of Sussex	N/A	none	0	0	0	Edgar Castellanos
A Study of a Malthusian Parameter in Relation to some Stochastic Models of Human Reproduction	Charles J. Mode	1	1	0	NA	Institute for Population Studies and Department of Mathematics Drexel University, Philadelphia, Pennsylvania 19104	none	N/A	0	0	0	Edgar Castellanos
Selection for Linkage Modification: I. Random Mating Populations	Marcus W. Feldman	1	1	0	NA	Department of Biological Sciences , Stanford University, California	Research supported in part under Grant NIH 10452 at Stanford University.The author is also grateful for Professor S. Karlin for a number of stimulating discussions during the preparation of the manuscript and to the Weitzman Institute of Science, Israel. The author is also indebted to Mrs. B.Balkau for her critical reading of the mauscript	N/A	0	0	0	Edgar Castellanos
Some Host Parasite Genetic Interaction Models	Paul Yu	1	1	0	NA	Department of Mathematics, Stanford University, California, 94305	Supported by National Institute of Health Grant USPHS 10452-09. Also Professor Mc.Gregor for suggesting this topic.	N/A	0	0	0	Edgar Castellanos
On Two-Sex Models Leading to Stable Populations	Prithwis Das Gupta	1	1	0	NA	Division of Biometry, School of Public Health, University of Minnesota, Minneapolis 55455	Research was partially supported by a trainning grant (No. 9 T01 HS 00053-17) from the National Center for Health Services Research and Development. Grateful for Professor R.B. McHughs, M.O. Kjelsberg, A.G. Fredrickson, Nathan Keyfitz and two anonymous referees.	N/A	0	0	0	Edgar Castellanos

[truncated: 107 more sheets: Vol 34 (1972), Vol 41 (1973), Vol 42 (1973), Vol 43 (1973), Vol 44 (1973), Vol 51 (1974), Vol 52 (1974), Vol 53 (1974), Vol 61 (1974) , Vol 62 (1974), Vol 63 (1974, Vol 71 (1975), Vol 72 (1975), Vol 73 (1975), Vol 81 (1975), Vol 82 (1975), Vol 83 (1975), Vol 91 (1976), Vol 92 (1976), Vol 93 (1976) …]
